# Supplementary material for: Unraveling Network Capability Construction in Platform-Dominated Entrepreneurial Ecosystems: Insights from the Alibaba Ecosystem
Source: Research Square preprint supplement (doi:10.21203/rs.3.rs-6353832/v1), 2025-07-07
Supplement: Supplementary file 1 [file d5421b6802fc8bfc78e4c30e.docx]

The data that support the findings of this study are available on request from the corresponding author, Wan Liu, upon reasonable request.
